# Supplementary material for: Adherence Status and Influencing Factors of Acute and Preventive pharmacotherapy Among Migraine Patients in China
Source: Research Square preprint supplement (doi:10.21203/rs.3.rs-7366539/v1), 2025-08-22
Supplement: Supplementary file 1 [file 08c968db7c69a42cdf2ee80f.docx]

Supplementary Table 1: Univariate Analysis of Acute-phase Medication Adherence in Migraine Patients.

| **Characteristic** | | | | **High Adherence（n=138）** | **Low Adherence（n=314）** | **p-value** |
| --- | --- | --- | --- | --- | --- | --- |
| **Demographics** | | | |  |  |  |
| Age, mean ± SD, y | | | | 37.54 ± 9.86 | 36.80 ± 10.03 | 0.98 |
| Gender, n (%) | | Male | | 33 (23.91%) | 76 (24.45%) | 0.52 |
| Female | | 105 (76.09%) | 238 (75.80%) |
| Family income (CNY/year)a * | | <￥80,000 | | 102 (73.91%) | 91 (28.98%) | <0.01 |
| ￥80,000-￥150,000 | | 5 (3.62%) | 115 (36.62%) |
| >￥150,000 | | 31 (22.46%) | 108 (34.39%) |
| Educational level, n (%)* | | < 9 years | | 16 (11.59%) | 60 (19.11%) | 0.07 |
| 10–12 years | | 24 (17.39%) | 38 (12.10%) |
| > 12 years | | 98 (71.01%) | 216 (68.79%) |
| Body mass index (kg/m2) | | | | 22.67 ± 3.24 | 22.84 ± 3.13 | 0.85 |
| **Clinical characteristics** | | | |  |  |  |
| Headache types , n (%)* | | | Probable migraine | 23 (16.67%) | 45 (14.33%) | 0.04 |
| Migraine without aura | 89 (64.49%) | 238 (75.80%) |  |
| Migraine with aura | 9 (6.52%) | 10 (3.18%) |  |
| Chronic migraine | 17 (12.32%) | 21 (6.69%) |  |
| Attack frequency (times/month) | | | | 7.13 ± 7.07 | 6.68 ± 6.61 | 0.4 |
| Duration of each headache attack (h) | | | | 38.47 ± 146.95 | 27.85 ± 111.87 | 0.13 |
| Pain intensity (VAS) | | | | 7.09 ± 1.79 | 6.89±1.79 | 0.75 |
| **Associated symptoms** | | | |  |  |  |
| Nausea, n (%) | | | | 92 (66.67%) | 198 (63.06%) | 0.39 |
| Vomiting, n (%)* | | | | 121 (87.68%) | 265 (84.39%) | 0.08 |
| Photophobia, n (%) | | | | 92 (66.67%) | 198 (63.06%) | 0.27 |
| Phonophobia, n (%) | | | | 121 (87.68%) | 265 (84.39%) | 0.22 |
| **Medication-related factors** | | | |  |  |  |
| Adverse effects, n (%)* | | | | 5 (3.62%) | 18 (5.73%) | 0.37 |
| Insurance reimbursemen, n (%)* | | | | 66(47.83%) | 98 (31.21%) | 0.01 |
| Satisfaction with Pain Relief , mean ± SD,b* | | | | 8.20 ± 1.54 | 6.87 ± 2.26 | <0.01 |
| Satisfaction with Functional Recovery mean ± SD,c* | | | | 7.88 ± 1.96 | 6.70 ± 2.33 | <0.01 |
| **Migraine Literacy** | | | |  |  |  |
| Identify headache triggering factors, n (%)* | | | | 117 (84.78%) | 224 (71.34%) | 0.03 |
| Accurate identification of migraine episodes, n (%) | | | | 61 (44.20%) | 146 (46.50%) | 0.36 |
| Patient valuation of pharmacotherapy, n (%)*  Significance | | | | 106 (76.81%) | 157 (50.00%) | <0.01 |
| MIDAS | 0-5 | | | 34 (24.64%) | 77 (24.52%) | 0.32 |
| 6-10 | | | 25 (18.12%) | 79 (25.16%) |
| 10-20 | | | 32 (23.19%) | 72 (22.93%) |
| ≥21 | | | 47 (34.06%) | 86 (27.39%) |
| Depression (PHQ-9) | 0-4 | | | 50 (36.23%) | 126 (40.13%) | 0.46 |
| 5-9 | | | 54 (39.13%) | 126 (40.13%) |
| 10-19 | | | 29 (21.04%) | 57 (18.15%) |
| ≥20 | | | 5 (3.62%) | 5 (1.59%) |
| Anxiety (GAD-7) | 0-4 | | | 81 (58.70%) | 178 (56.69%) | 0.97 |
| 5-9 | | | 42 (30.43%) | 102 (32.48%) |
| 10-19 | | | 13 (9.42%) | 30 (9.55%) |
| ≥20 | | | 2 (1.45%) | 4 (1.27%) |  |
| PSQI* | ≤5 | | | 37 (26.81%) | 111(35.35%) | 0.08 |
| ≥6 | | | 101 (73.19%) | 203 (64.65%) |

Supplementary Table 2: Univariate Analysis of Preventive Medication Adherence in Migraine Patients.

| **Characteristic** | | | High Adherence (n=82） | Low Adherence (n=72) | p-value |
| --- | --- | --- | --- | --- | --- |
| **Demographics** | | |  |  |  |
| Age, mean ± SD, y | | | 37.16 ± 10.469 | 39.8 ± 10.713 | 0.85 |
| Gender, n (%) | | Male | 17 (20.73%) | 21 (29.17%) | 0.26 |
| Female | 65 (79.27%) | 51 (70.83%) |
| Family income (CNY/year)a | | <￥80,000 | 29 (35.37%) | 22(30.56%) | 0.54 |
| ￥80,000-￥150,000 | 27 (32.93%) | 35 (48.61%) |  |
| >￥150,000 | 26 (32.71%) | 15 (20.83%) |  |
| Educational level, n (%) | | < 9 years | 15 (18.29%) | 12 (16.67%) | 0.12 |
| 10–12 years | 13 (15.85%) | 13 (18.06%) |
| > 12 years | 54 (65.85%) | 47 (65.28%) |
| Body mass index (kg/m2) | | | 22.93 ± 3.02 | 22.32 ± 2.95 | 0.95 |
| **Clinical characteristics** | | |  |  |  |
| Headache types , n (%) | | Probable migraine | 8 (9.76%) | 6 (8.33%) | 1.00 |
| Migraine without aura | 63 (78.75%) | 49 (68.06%) |
| Migraine with aura | 3 (3.75%) | 3 (4.17%) |
| Chronic migraine | 12 (14.63%) | 10 (13.89%) |
| Attack frequency (times/month)* | | | 9.36 ± 8.52 | 8.84 ± 7.191 | 0.02 |
| Duration of each headache attack (h) | | | 28 ± 111.36 | 40.08 ± 153.74 | 0.5 |
| Pain intensity (VAS) | | | 7.14 ± 1.66 | 7.22 ± 1.64 | 0.98 |
| **Associated symptoms** | | |  |  |  |
| Nausea, n (%) | | | 71 (86.59%) | 64 (88.89%) | 0.81 |
| Vomiting, n (%) | | | 39 (47.56%) | 40 (55.56%) | 0.34 |
| Photophobia, n (%) | | | 43 (52.44%) | 45 (62.50%) | 0.25 |
| **Medication-related factors** | | |  |  |  |
| Adverse effects, n (%)* | | | 20 (24.39%) | 27 (37.50%) | 0.05 |
| Insurance reimbursemen, n (%)* | | | 50 (60.98%) | 33 (45.83%) | 0.08 |
| Satisfaction with Pain Relief, mean ± SD,b* | | | 8.09 ± 2.01 | 6.28 ± 2.90 | 0.01 |
| Satisfaction with Functional Recovery mean ± SD,c* | | | 8.05 ± 1.99 | 5.95 ± 3.0 | <0.01 |
| **Migraine Literacy** | | |  |  |  |
| Identify headache triggering factors, n (%) | | | 66 (80.49%) | 56 (77.78%) | 0.7 |
| Accurate identification of migraine episodes, n (%) | | | 38 (46.34%) | 36 (50.00%) | 0.75 |
| Patient valuation of pharmacotherapy, n (%)*  Significance | | | 67 (81.71%) | 23 (31.94%) | <0.01 |
| MIDAS | 0-5 | | 15 (18.29%) | 13 (18.06%) | 0.27 |
| 6-10 | | 19 (23.17%) | 11 (15.28%) |
| 10-20 | | 13 (15.85%) | 20 (27.78%) |
| ≥21 | | 35 (42.68%) | 28 (38.89%) |
| Depression (PHQ-9) | 0-4 | | 34 (41.46%) | 25 (34.72%) | 0.48 |
| 5-9 | | 33 (40.24%) | 31 (43.06%) |
| 10-19 | | 9 (10.98%) | 13 (18.06%) |
| ≥20 | | 6 (7.32%) | 3 (4.17%) |
| Anxiety (GAD-7) | 0-4 | | 51 (62.20%) | 39 (54.17%) | 0.62 |
| 5-9 | | 21 (25.61%) | 25 (34.72%) |
| 10-19 | | 5 (6.10%) | 5 (6.94%) |
| ≥20 | | 5 (6.10%) | 3 (4.17%) |
| PSQI* | ≤5 | | 21 (25.61%) | 18 (25.00%) | 1.00 |
| ≥6 | | 61 (74.39%) | 54 (75.00%) |

Supplementary Table 3: Univariate Analysis of Factors Affecting Migraine Treatment Efficacy.

| **Characteristic** | | Positive Outcomes (n=74) | Poor Outcomes (n=80) | p-value |
| --- | --- | --- | --- | --- |
| **Demographics** | |  |  |  |
| Age, mean ± SD, y | | 40.20 ± 10.99 | 36.69 ± 10.48 | 0.51 |
| Gender, n (%) | Male | 16 (21.62%) | 22 (27.50%) | 0.46 |
| Female | 58 (78.38%) | 58 (72.50%) |
| Body mass index (kg/m2) | | 22.89 ± 2.96 | 22.55 ± 3.05 | 0.65 |
| **Clinical characteristics** | |  |  |  |
| Headache types, n (%) | Probable migraine | 5 (6.76%) | 9 (11.25%) | 0.61 |
| Migraine without aura | 55 (74.32%) | 57 (71.25%) |
| Migraine with aura | 2 (2.70%) | 4 (5.00%) |
| Chronic migraine | 12 (16.21%) | 10 (12.50%) |
| Attack frequency, mean ± SD, times/month | | 11.15 ± 8.05 | 7.68 ± 8.14 | 0.60 |
| Duration of each headache attack, mean ± SD, h | | 33.28 ± 119.95 | 37.28 ± 155.70 | 0.60 |
| Pain intensity, mean ± SD, VAS | | 7.26 ± 1.68 | 7.05 ± 1.57 | 0.78 |
| **Associated symptoms** | |  |  |  |
| Nausea, n (%)* | | 69 (93.24%) | 66 (82.50%) | <0.01 |
| Vomiting, n (%)* | | 38 (51.35%) | 41 (51.25%) | <0.01 |
| Photophobia, n (%) | | 41 (55.41%) | 47 (58.75%) | 0.75 |
| Phonophobia, n (%) | | 60 (81.08%) | 66 (82.50%) | 0.84 |
| **Medication-related factors** | |  |  |  |
| Adverse effects, n (%) | | 20 (27.03%) | 25 (31.25%) | 0.28 |
| Insurance reimbursemen, n (%)* | | 45 (60.81%) | 38 (47.50%) | 0.1 |
| High Adherence, n (%)* | | 60 (81.08%) | 22 (27.50%) | <0.01 |
| **Migraine Literacy** | |  |  |  |
| Identify headache triggering factors, n (%) | | 60 (81.08%) | 62 (77.50%) | 0.69 |
| Accurate identification of migraine episodes, n (%) | | 40 (54.05%) | 34 (42.50%) | 0.20 |
| Patient valuation of pharmacotherapy, n (%)*  Significance | | 58 (78.38%) | 32 (40.00%) | <0.01 |
| MIDAS | 0-5 | 8 (10.81%) | 20 (25.00%) | 0.15 |
| 6-10 | 16 (21.62%) | 14 (17.50%) |
| 10-20 | 18 (24.32%) | 15 (18.75%) |
| ≥21 | 32 (43.24%) | 31 (38.75%) |
| Depression (PHQ-9) | 0-4 | 28 (37.84%) | 31 (38.75%) | 0.31 |
| 5-9 | 30 (40.54%) | 34 (42.50%) |
| 10-19 | 9 (12.16%) | 13 (16.25%) |
| ≥20 | 7 (9.46%) | 2 (2.50%) |
| Anxiety (GAD-7) | 0-4 | 45 (60.81%) | 45 (56.25%) | 0.71 |
| 5-9 | 20 (27.03%) | 26 (32.50%) |
| 10-19 | 4 (5.41%) | 6 (7.50%) |
| ≥20 | 5 (6.76%) | 3 (8.75%) |
| PSQI | ≤5 | 17 (22.97%) | 21 (26.25%) | 0.71 |
| ≥6 | 57 (77.03%) | 59 (73.75%) |

Abbreviation: n, number; y, year; CNY, Chinese Yuan; h, hours; SD, Standard Deviation; VAS, Visual Analog Scale; MIDAS: Migraine Disability Assessment; PHQ-9: Patient Health Questionnaire-9; GAD-7: Generalized Anxiety Disorder-7; PSQI: Pittsburgh Sleep Quality Index.

a 80,000 CNY ≈ 1,1136 USD; 150,000 CNY ≈ 2,0880 USD (1 CNY ≈ 0.14 USD).

b Satisfaction with pain relief" refers to a patient’s self-rated satisfaction score regarding the effectiveness of medication in alleviating pain, measured on a numerical rating scale ranging from 0 (completely dissatisfied) to 10 (completely satisfied)

c Satisfaction with functional recovery" refers to a patient’s self-rated satisfaction score regarding the restoration of daily living and work capacity after medication use, measured on a numerical scale ranging from 0 (completely dissatisfied) to 10 (completely satisfied).

**P*<0.1

Supplementary Table 4：Acute medication prescription proportions and corresponding good adherence rates. (n=452)

| **Medicine** | **Drug prescription proportions** | **Corresponding good adherence rates** |
| --- | --- | --- |
| **NSAIDs** |  |  |
| Ibuprofen | 44.25% | 30.91% |
| Diclofenac Sodium | 1.33% | 33.33% |
| Loxoprofen | 2.88% | 23.08% |
| **Triptans** |  |  |
| Rizatriptan Benzoate | 16.59% | 36.00% |
| Zolmitriptan | 9.29% | 47.62% |
| **Combination analgesics** |  |  |
| Compound Aspipin Tablets | 0.66% | 0.00% |
| Acetaminophen | 7.8% | 21.88% |
| Combination Analgesic Granules | 0.88% | 25.00% |
| Aminophenazone and Caffeine Tablets | 2.43% | 45.45% |
| Combination Analgesic Tablets | 11.28% | 19.61% |
| **Gepants** |  |  |
| Rimegepant | 2.43% | 72.73% |
| **TCMs** |  |  |
| Tianshu Capsule | 0.44% | 50.00% |
| Yuanhu Zhitong Tablet | 0.88% | 0.00% |
| Nao Yi Qing Capsule | 0.44% | 0.00% |
| Yangjiao Tablet | 0.44% | 0.00% |
| Xiaoyao Pill | 0.22% | 50.00% |

Abbreviation: n, number; NSAIDs, Non-Steroidal Anti-Inflammatory Drugs; TCMs, Chinese traditional medicines.

Supplementary Table 5：Preventive medication prescription proportions and corresponding good adherence rates. (n=154)

| **Medicine** | **Drug prescription proportions** | **Corresponding good adherence rates** |
| --- | --- | --- |
| **Calcium Channel Blocker** |  |  |
| Flunarizine | 35.70% | 65.45% |
| **Antiepileptic** |  |  |
| Topiramate | 31.82% | 53.06% |
| Sodium Valproic | 10.39% | 43.75% |
| **Calcium Channel Modulators** |  |  |
| Pregabalin | 11.04% | 52.94% |
| Gabapentin | 3.25% | 52.00% |
| **Antidepressant** |  |  |
| Amitriptyline | 6.49% | 40.00% |
| Venlafaxine | 5.84% | 0.00% |
| **TCMs** |  |  |
| Tianshu Capsule | 3.25% | 40.00% |
| Herbal Decoctions | 2.60% | 25.00% |

Abbreviation: n, number; TCMs, Chinese traditional medicines.
