# Supplementary material for: Adherence Status and Influencing Factors of Acute and Preventive pharmacotherapy Among Migraine Patients in China
Source: Research Square preprint supplement (doi:10.21203/rs.3.rs-7366539/v1), 2025-08-22
Supplement: Supplementary file 2 [file 7b84a726285bee4d76425c4f.docx]

**Migraine Patients' Adherence Study**

1.Patient ID: *

_________________________________

2. Name:  *

_________________________________

1. Does the patient meet the following diagnostic criteria? (Refer to baseline data - to be completed by researcher) [Multiple select] *

| ☐ Chronic migraine  ☐ Migraine with aura  ☐ Migraine without aura  ☐ Probable migraine |
| --- |

Acute-phase treatment

4. Have you experienced any headache attacks since your first visit to our hospital? [Single choice] *

○ Yes

○ No (Skip to Q24)

5. (If Yes to Q4) Did you use pain-relief medication during these headache attacks? [Single choice] *

○ Yes

○ No

6. (If Yes to Q5) Which pain-relief medications did you use? [Check all that apply] *

□ Ibuprofen (Fenbid)

□ Acetaminophen/Paracetamol

□ Loxoprofen (Loxonin)

□ Compound Analgesic Tablets ("Qu Tong Pian")

□ Rizatriptan Benzoate (Maxalt)

□ Zolmitriptan

□ Other (please specify): _________________

7. (If Yes to Q5)When do you typically take pain-relief medication? [Check all that apply] *

□ Before headache onset (with no prodromal symptoms, but anticipating an attack)

□ During prodrome (with ≥1 of: dizziness, fatigue, nausea, vomiting, cranial discomfort, yawning, neck stiffness/pain, photophobia, phonophobia, pallor, blurred vision, paresthesia)

□ At mild pain onset (noticeable but manageable)

□ At moderate pain onset (interferes with daily activities)

□ At severe pain onset (debilitating, requires rest)

□ During aura symptoms (visual disturbances [flashes, zigzags, scotoma], hemisensory numbness, hemiparesis, aphasia)

8. Do you use medication for every headache attack? [Single choice] *

○ Yes, for every attack

○ For most attacks (>50%)

○ For few attacks (<50%)

○ Never use medication

9. (If Q8 to 2,3,4) What is your main reason for not using medication? [Single choice] *

○ Headache is mild and doesn't require medication

○ Prefer to avoid taking drugs

○ Medications were ineffective

○ Other (please specify): _________________

(Only answer if you selected "For most", "For few", or "Never" in Question 8)

10. (If Q5 to Yes) Did you experience any adverse effects from pain-relief medications? [Single choice] *

○ Yes

○ No

11. (If Q10 to Yes) Please describe the adverse effects you experienced: [Open-ended] *

_________________

12. (If Q10 to Yes) Did you discontinue medication due to severe adverse effects? [Single choice] *

○ Yes

○ No

13. (If Q12 to Yes) Please specify the severe adverse effects that led to discontinuation: [Open-ended] *

_________________

14. How satisfied are you with this medication's effectiveness for pain relief?

*(0 = Very dissatisfied, 10 = Very satisfied)* [Numerical input] *

_________________

15. How satisfied are you with this medication's effectiveness in restoring normal function

*(e.g., work/daily activities)? (0 = Very dissatisfied, 10 = Very satisfied)* [Numerical input] *

_________________

16. (Investigator-Assessed) Does the patient show any of the following non-adherence behaviors? [Check all that apply] *

□ Non-adherence to guideline-recommended medications(Recommended: NSAIDs [ibuprofen, diclofenac, aspirin, naproxen, celecoxib], caffeine-containing combinations, triptans, gepants, ergotamines, ditans)

□ Acute headache medication abstinence

□ Self-initiated pre-attack medication in symptom-free phase

□ Administration after pain progression to moderate/severe intensity

□ Medication overuse

*(NSAIDs >10 days/month, triptans >8 days/month, or caffeine-combinations >8 days/month)*

□ No adherence issues observed

17. Reasons for medication non-adherence: [Check all that apply] *

□ Adverse effects occurred

□ Fear of potential adverse effects

□ Pregnancy/pregnancy planning

□Failure to persist with medication

□ Mild headache deemed non-requiring medication

□ Preferred non-pharmacological therapy

□ General reluctance to take medication

□Suboptimal therapeutic efficacy

□ Lack of physician instructions

□ Other (specify): _________________

18. (If Q5 to Yes) Is your pain-relief medication covered by insurance? [Single choice] *

○ Yes

○ No

### Patient Awareness Survey on Migraine

19. Are you aware of your personal migraine triggers? [Single choice] *

○ Yes

○ No

20. (If Q19 to Yes) Which factors trigger your migraines? [Check all that apply] *

□ Poor sleep quality

□ Physical exhaustion

□ Loud/noisy environments

□ High psychological stress

□ Emotional excitement

□ Other (please specify): _________________

21. Can you accurately recognize the onset of your migraine attacks? [Single choice] *

○ Yes

○ No

22. How important do you believe pain-relief medication is for your headache improvement? [Single choice] *

○ Extremely important

○ Somewhat helpful

| ○ Unsure |
| --- |
|  |

○ Minimally effective

Follow-up: Preventive Treatment Efficacy and Adherence Record

23. Did the physician prescribe preventive medication? [Single choice] *

○ Yes

○ No

24. Are you currently using preventive migraine medication? [Single choice] *

○ Yes

○ No (Skip to Q36)

25. (If Q24 to Yes) Preventive medications & dosages:

(Select all used, then specify maintenance dose in blanks. For titrated doses, record target dose.) [Check all that apply] *

□ Topiramate _________________ mg/day

□ Flunarizine _________________ mg/day

□ Sodium valproate _________________ mg/day

□ Amitriptyline _________________ mg/day

□ Pregabalin _________________ mg/day

□ Other (specify): _________________ mg/day

26. (If Q24 to Yes) Duration of use: [Numerical input] *

__________ months

27. (If Q24 to Yes) Average headache VAS score during preventive treatment: [Numerical input] *

__________ (0=no pain, 10=worst imaginable)

28. (If Q24 to Yes) How satisfied are you with this medication's effectiveness for pain prevention?

*(0 = Very dissatisfied, 10 = Very satisfied)* [Numerical input] *

29. (If Q24 to Yes) How satisfied are you with this medication's effectiveness in restoring normal function

*(work/daily activities)? (0 = Very dissatisfied, 10 = Very satisfied)* [Numerical input] *

30. (If Q24 to Yes) Did you experience any adverse effects from the preventive medication? [Single choice] *

○ Yes

○ No

1. (If Q30 to Yes) Please describe the adverse effects: [Open-ended] *

__________

32. (If Q24 to Yes) Have you taken the preventive medication as prescribed ≥80% of the time? [Single choice] *

○ Yes

○ No

33. (If Q32 to No) Primary reason for non-adherence: [Single choice] *

□ Adverse effects occurred

□ Fear of potential adverse effects

□ Pregnancy/pregnancy planning

□Failure to persist with medication

□ Mild headache deemed non-requiring medication

□ Preferred non-pharmacological therapy

□ General reluctance to take medication

□ Perceived inefficacy

□ Lack of physician instructions

□ Other (specify): _________________

34. (If Q30 to Yes) Did you discontinue preventive medication due to severe adverse effects? [Single choice] *

○ Yes

○ No

35. (If Q34 to Yes) Specify the severe adverse effects: [Open-ended] *

_________________

36. Number of headache attacks in the past month: [Numerical input] *

_________________

37. (If Q24 to Yes) How important was the preventive medication for your headache improvement? [Single choice] *

○ Extremely important

○ Moderately helpful

○ Minimally effective

○ Unsure

38. (If Q24 to Yes) Is your preventive migraine medication covered by insurance? [Single choice] *

○ Yes

○ No

Long-Term Follow-Up: Current Headache Frequency & Severity

39. Total number of headache days in the past 3 months

(Count each calendar day; if headache persists >24 hours, count each day separately) [Numerical input] *

__________ days

40. Total number of moderate-to-severe headache days in the past 3 months

*(Pain intensity ≥4 on 0-10 scale; count each day separately for prolonged attacks)* [Numerical input] *

__________ days

41. Do you keep a headache diary? [Single choice] *

○ Yes, daily entries

○ Only record during attacks

○ Occasional entries

○ Initially kept but discontinued

○ No, never maintained
